# Supplementary material for: Safety of Vitamin D Food Fortification and Supplementation: Evidence from Randomized Controlled Trials and Observational Studies
Source: Foods. 2021 Dec 9;10(12):3065. doi: 10.3390/foods10123065 (PMC8701201; doi:10.3390/foods10123065)
Supplement: Supplementary file 1 [file foods-10-03065-s001.zip › foods-1458487-supplementary.pdf]

Article

# Safety of Vitamin D Food Fortification and Supplementation: Evidence from Randomized Controlled Trials and Observational Studies

Folasade A. Adebayo <sup>1</sup>, Suvi T. Itkonen <sup>1</sup>, Taina Öhman <sup>1</sup>, Mairead Kiely <sup>2</sup>, Kevin D. Cashman <sup>2</sup>, Christel Lamberg-Allardt <sup>1,\*</sup> and on behalf of the ODIN consortium <sup>†</sup>

<sup>1</sup> Calcium Research Unit, Department of Food and Nutrition, University of Helsinki, Helsinki, P.O. Box 66, FI-00014, Finland; [folasade.adebayo@helsinki.fi](mailto:folasade.adebayo@helsinki.fi) (F.A.A.); [suvi.itkonen@helsinki.fi](mailto:suvi.itkonen@helsinki.fi) (S.T.I.); [taina.ohman@gmail.com](mailto:taina.ohman@gmail.com) (T.Ö)

<sup>2</sup> Cork Centre for Vitamin D and Nutrition Research, School of Food and Nutritional Sciences, University College Cork, T12 Y337 Cork, Ireland; [M.Kiely@ucc.ie](mailto:M.Kiely@ucc.ie) (M.K.); [K.Cashman@ucc.ie](mailto:K.Cashman@ucc.ie) (K.D.C.)

\* Correspondence: [christel.lamberg-allardt@helsinki.fi](mailto:christel.lamberg-allardt@helsinki.fi)

<sup>†</sup> the ODIN Consortium are listed in acknowledgments.

## Supplementary data:

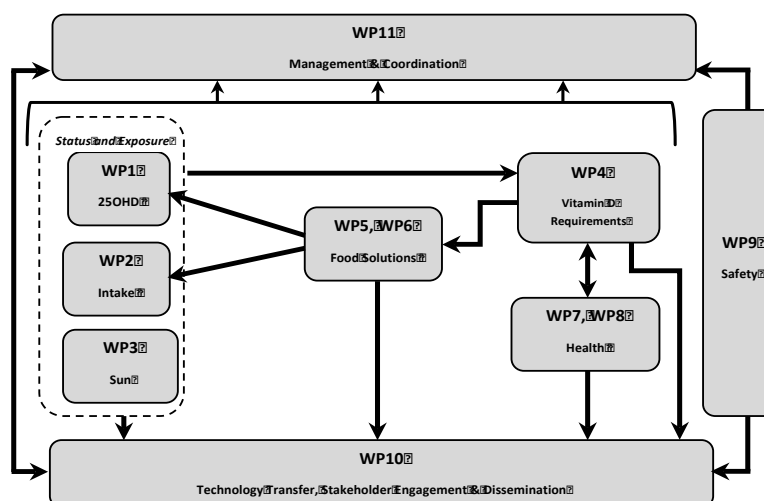

**Figure S1.** The work packages (WP) within the ODIN vitamin D project and their work-flow and interdependencies. WP1-8 reported all their safety data to WP9 as the dedicated safety WP.

**Table S1.** Tolerable upper intake levels (ULs) for vitamin D.

| Age*                 | Vitamin D UL recommendations |                    |
|----------------------|------------------------------|--------------------|
|                      | IOM (USA)                    | EFSA (EU)          |
| 0-6 months           | 25 µg (1,000 IU)             | 25 µg (1,000 IU)** |
| 6/[7]–12 months      | 38 µg (1,500 IU)             | 35 µg (1,500 IU)** |
| 1–3 years            | 63 µg (2,500 IU)             | 50 µg (2,500 IU)   |
| 4–8/[10] years       | 75 µg (3,000 IU)             | 50 µg (3,000 IU)   |
| 9/[11]–[17]/18 years | 100 µg (4,000 IU)            | 100 µg (4,000 IU)  |
| [18]/19+ years       | 100 µg (4,000 IU)            | 100 µg (4,000 IU)  |
| Pregnancy            | 100 µg (4,000 IU)            | 100 µg (4,000 IU)  |
| Lactation            | 100 µg (4,000 IU)            | 100 µg (4,000 IU)  |

IOM, Institute of Medicine; EFSA, European Food Safety Authority. \*Ages shown in brackets reflect where EFSA had differences in age bracket to that of IOM. \*\*EFSA, 2018, all other from EFSA 2012

**Table S2.** Included national nutrition surveys and epidemiological cohorts/samples of European populations and prevalence of high serum 25-hydroxyvitamin D (25(OH)D) concentrations (>125 nmol/L).

| Type of Study                                          | Country              | Included surveys                                                                                                              | n       | % of S-25(OH)D >125 nmol/L* |                   | References                                                                          |
|--------------------------------------------------------|----------------------|-------------------------------------------------------------------------------------------------------------------------------|---------|-----------------------------|-------------------|-------------------------------------------------------------------------------------|
|                                                        |                      |                                                                                                                               |         | Yearly                      | Extended winter** |                                                                                     |
| Pooled analysis of 20 surveys with various populations | 9 European countries | Healthy Lifestyle in Europe by Nutrition in Adolescence (HELENA) study                                                        | 1006    | 0                           | 0                 | Moreno et al. 2008, González-Gross et al. 2012                                      |
|                                                        | Denmark              | The Optimal well-being, development and health for Danish children through a healthy New Nordic Diet (OPUS) School Meal Study | 779     | 0                           | 0                 | Damsgaard et al. 2012, Damsgaard et al. 2014                                        |
|                                                        | Norway               | The Tromsø Study: Fit Futures                                                                                                 | 890     | 0                           | 0                 | Oberg et al. 2014, Winther et al. 2014, The Tromsø Study 2021                       |
|                                                        | Greece               | The Healthy Growth Study (HGS)                                                                                                | 806     | 0                           | 0                 | Moschonis et al. 2010                                                               |
|                                                        | Greece               | The Infant's Nourishment and Nutritional Status (INNS) study                                                                  | 222     | 0                           | 0                 | McBride et al. 2012                                                                 |
|                                                        | Ireland              | The Cork BASELINE birth cohort study                                                                                          | 742     | 0.4                         | 0.5               | Kiely et al. 2017, Ni Chaoimh et al. 2018                                           |
|                                                        | Germany              | The German Health Interview and Examination Survey for Children and Adolescents (KIGGS)                                       | 10,015  | 0                           | 0                 | Kurth et al. 2008                                                                   |
|                                                        | United Kingdom       | National Diet and Nutrition Survey (NDNS): Years 1-4 (combined) of the Rolling Programme (2008/2009 – 2011/12)                | 511+977 | 0                           | 0                 | National Diet and Nutrition Survey 2014                                             |
|                                                        | Germany              | The German Health Interview and Examination Survey for Adults (DEGS) ***                                                      | 6995    | 0                           | 0                 | Scheidt-Nave et al. 2012, Kamtsiuris et al. 2013                                    |
|                                                        | Norway               | The Tromsø study - 6 <sup>th</sup> Survey (Tromsø 6)                                                                          | 12,817  | 0.6                         | 0.3               | Grimnes et al. 2010, Jacobsen et al. 2012, Eggen et al. 2013, The Tromsø Study 2021 |
|                                                        | Netherlands          | The New Hoorn Study (NHS) ***                                                                                                 | 2625    | 0.4                         | 0.3               | van 't Riet et al. 2010                                                             |
|                                                        | Netherlands          | Longitudinal Aging Study Amsterdam (LASA) 2009                                                                                | 915     | 0.7                         | 0                 | Huisman et al. 2011                                                                 |
|                                                        | Iceland              | The Age, Gene/Environment Susceptibility (AGES-Reykjavik) study***                                                            | 5519    | 0                           | 0                 | Harris et al. 2007                                                                  |
|                                                        | Finland              | The Finnish Migrant Health and Wellbeing Study (Maamu)                                                                        | 1310    | 0.3                         | 0.2               | Tiittala et al. 2015, Finnish Institute for Health and Welfare 2021                 |

Table S2 continued...

| Type of Study                               | Country     | Included surveys                                          | <i>n</i> | % of S-25(OH)D >125 nmol/L* |                          | References           |
|---------------------------------------------|-------------|-----------------------------------------------------------|----------|-----------------------------|--------------------------|----------------------|
|                                             |             |                                                           |          | <i>Yearly</i>               | <i>Extended winter**</i> |                      |
| Pooled analysis of two pregnant cohorts     | Ireland     | The SCOPE Ireland pregnancy cohort study                  | 1786     | 0.5                         | 0                        | Kiely et al. 2016    |
|                                             | Sweden      | The GraviD cohort                                         | 2079     | 0.4                         | 0                        | Bärebring et al.2016 |
| Meta-analysis of eight older adults cohorts | Germany     | Ludwigshafen Risk and Cardiovascular Health (LURIC) Study | 3299     | 0.4                         | 0.2                      | Gaksch et al. 2016   |
|                                             | Denmark     | Aarhus Mammography Cohort Study                           | 2473     | 0.6                         | 0.3                      |                      |
|                                             | Norway      | The Tromsø study - 4 <sup>th</sup> Survey (Tromsø 4)      | 7145     | 0.03                        | 0.03                     |                      |
|                                             | Netherlands | Longitudinal Aging Study Amsterdam (LASA) 1995            | 1302     | 0                           | 0                        |                      |
|                                             | Netherlands | Longitudinal Aging Study Amsterdam (LASA) 2002            | 734      | 0.1                         | 0.1                      |                      |

\*Percentages rounded; \*\*October to March; \*\*\*Also included in meta-analysis of eight older adults cohort
